# Supplementary material for: Influence of type of dairy matrix micro- and macrostructure on in vitro lipid digestion
Source: Royal Society of Chemistry journal article supplement (doi:10.1039/d0fo00785d), 2020-01-01
Supplement: d0fo00785d1.pdf [file d0fo00785d1.pdf]

## Electronic supplementary information

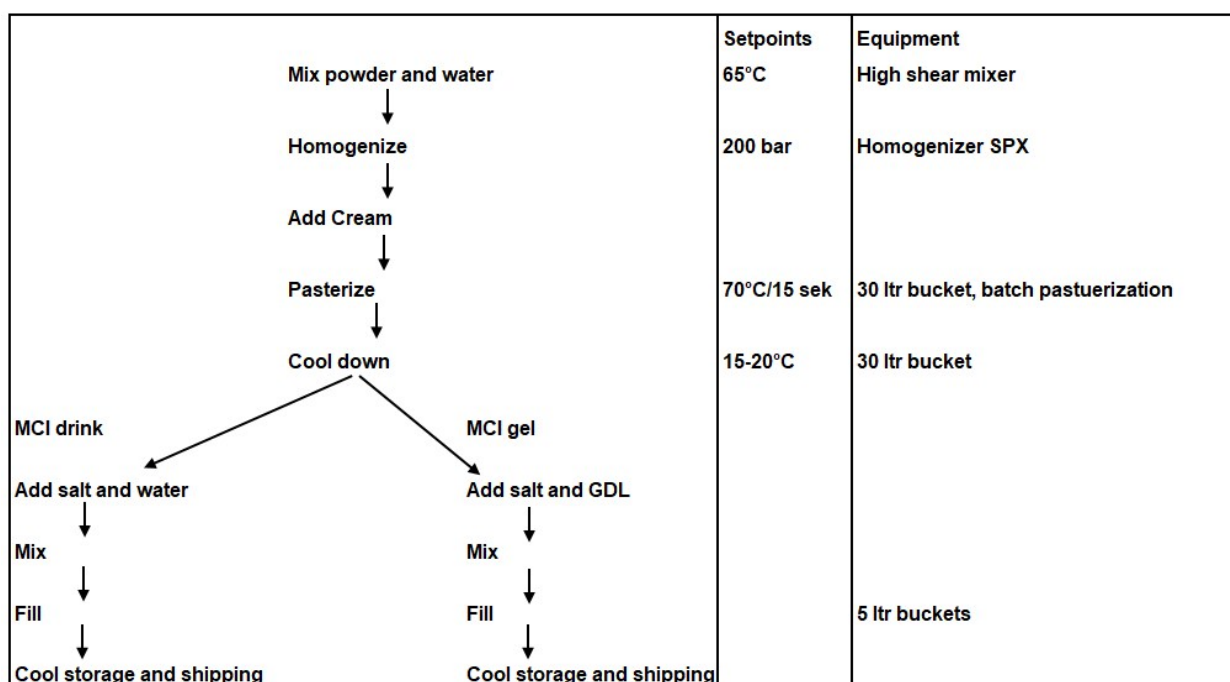

**Suppl. Fig 1.** Process diagram of production of MCI Drink and MCI Gel

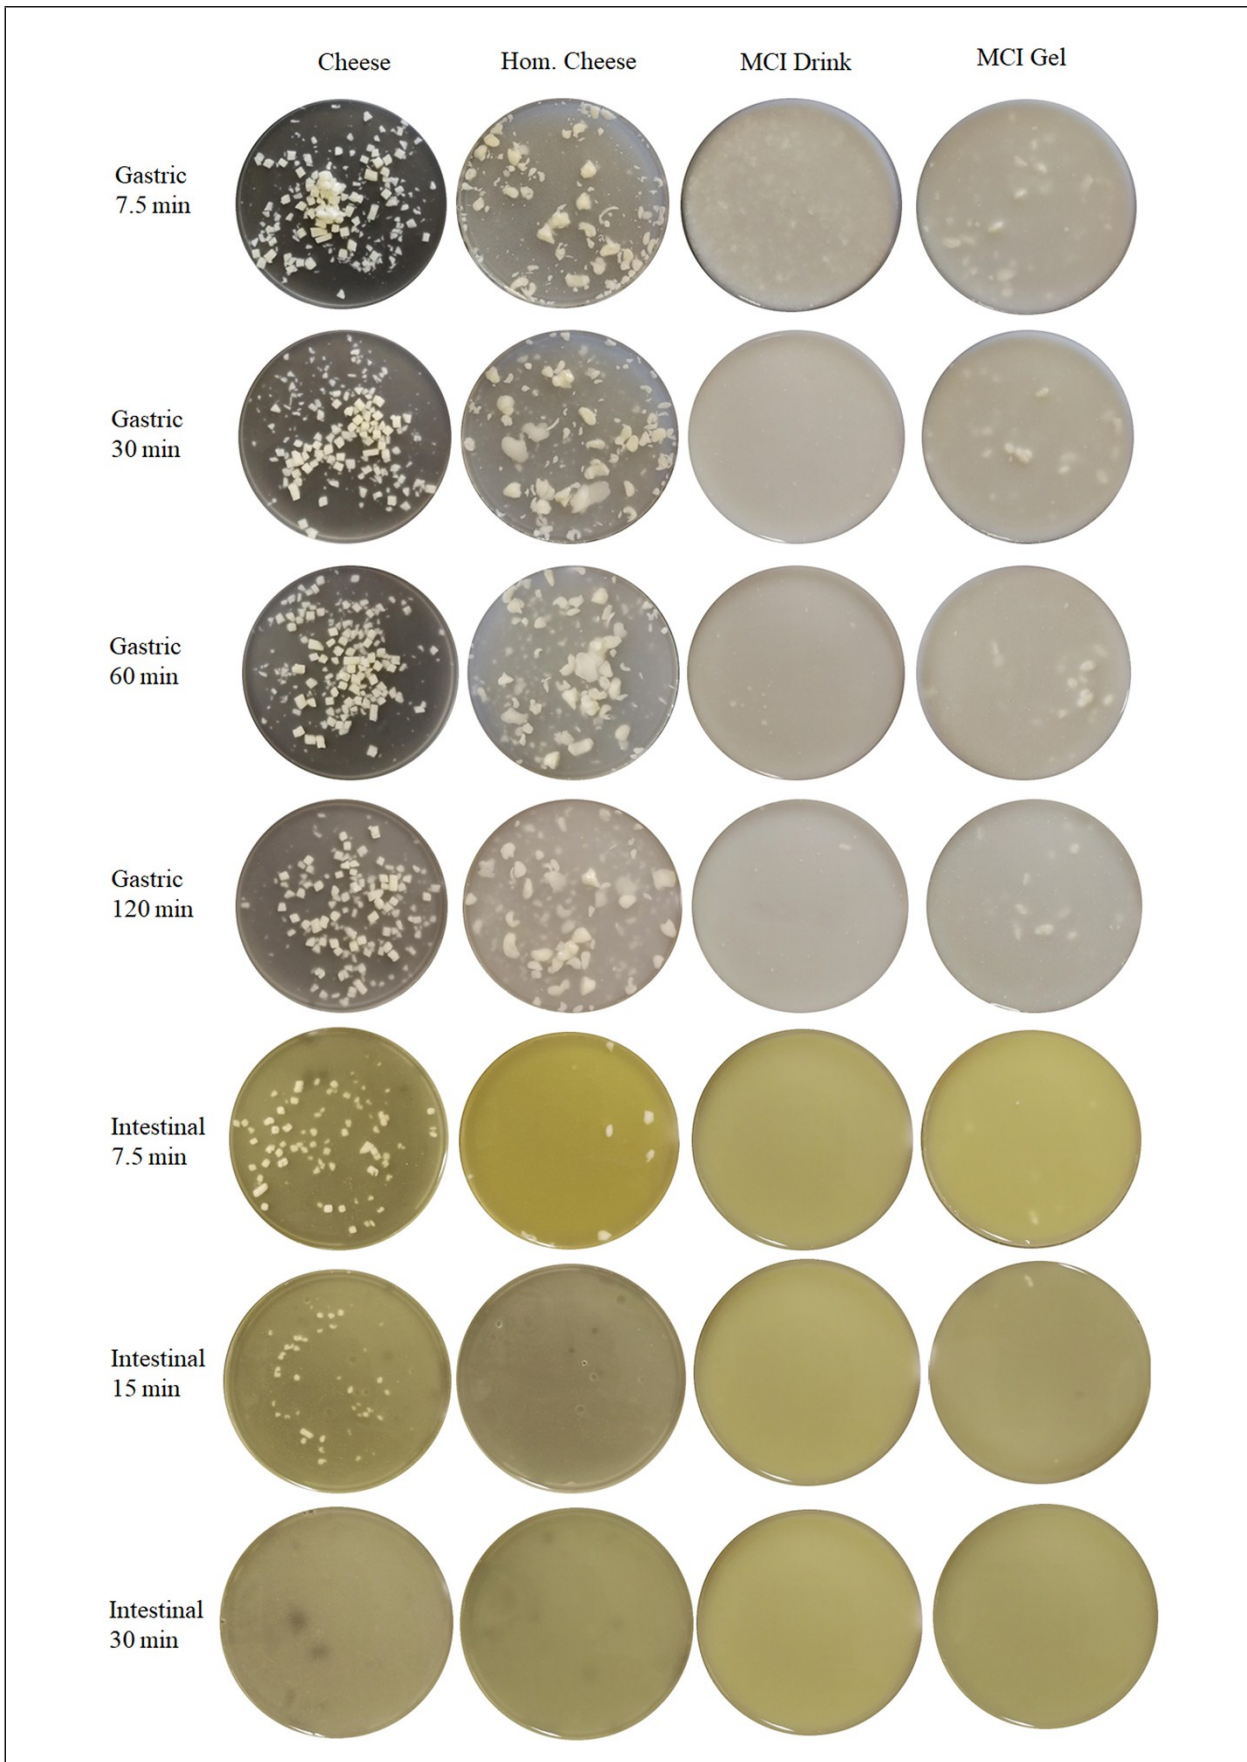

**Suppl. Fig 2.** Photos of dairy samples during gastric and intestinal digestion. The diameter of each sample image is 9 cm.

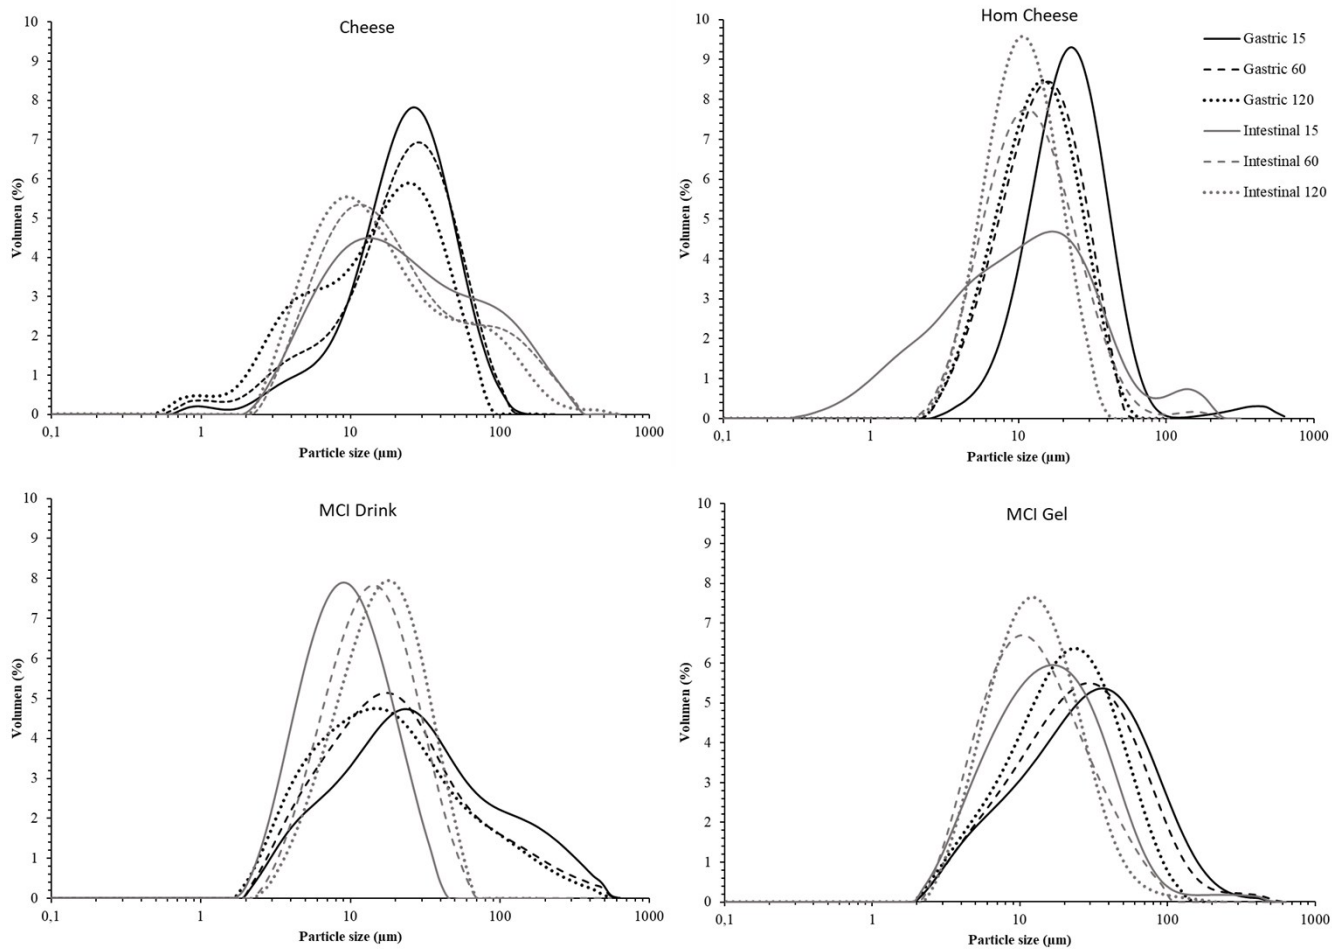

**Suppl. Fig. 3.** Particle size distribution of dairy samples during gastric (black lines) and intestinal (grey lines) phases with time of each phase given as 15 (solid line), 60 (dashed line) and 120 (dotted line) minutes, respectively for A) Cheese, B) Hom Cheese, C) MCI Drink, D) MCI Gel.
